# Supplementary material for: Copper-Chelated Hyperbranched Polyethyleneimines with Antifungal Activity against quiescent conidia and germlings of the opportunistic fungal pathogen Aspergillus nidulans
Source: Research Square preprint supplement (doi:10.21203/rs.3.rs-5895555/v1), 2025-05-30
Supplement: Supplementary file 1 [file df982a5225d1bf114d67dc98.docx]

Supplementary material

Fig. S1. (A) UV–Vis spectra of PEI–Cu(II) complexes of various Cu(II):primary amino groups of PEI molar ratios in phosphate buffer (pH 7.4, polymer concentration 2 mg mL-1, optical path length 1 mm); (B) plot of absorbance at 632 nm of PEI–Cu(II) complex vs. Cu(II):primary amino groups molar ratio.

Fig. S2. Mean hydrodynamic radii and zeta-potential values of PEI and PEI–Cu(II) complexes of various Cu(II):primary amino groups of PEI molar ratios (pH 7.4, polymer concentration 10 mg mL-1). Data are expressed as mean ± SD of at least 10 independent values.
